# Supplementary material for: The Role of Crosslinker Content of Positively Charged NIPAM Nanogels on the In Vivo Toxicity in Zebrafish
Source: MDPI journal article supplement (doi:10.3390/pharmaceutics15071900), 2023-07-07
Supplement: s1 [file s1]

## **Supplementary Materials**

# **The Role of Crosslinker Content of Positively Charged NIPAM Nanogels on the In Vivo Toxicity in Zebrafish**

**Roberta Bilardo <sup>1</sup>, Federico Traldi <sup>1</sup>, Caroline H. Brennan <sup>2</sup> and Marina Resmini <sup>1,\*</sup>**

<sup>1</sup> Department of Chemistry, School of Physical and Chemical Sciences, Queen Mary University of London, London E1 4NS, UK; r.bilardo@qmul.ac.uk (R.B.); f.traldi@qmul.ac.uk (F.T.)

<sup>2</sup> School of Biological and Behavioural Sciences, Queen Mary University of London, London E1 4NS, UK; c.h.brennan@qmul.ac.uk

\* Correspondence: m.resmini@qmul.ac.uk

**Table S1.** Chemical composition, monomer conversions ( $^1\text{H}$  NMR) and chemical yields of positively charged NIPAM-based nanogels, containing 10 mol% *t*-BAEMA as functional monomer, before the optimization of the polymerization conditions. All nanogels were synthesized with MBA as the crosslinker in relative concentrations ranging between 5 – 20 mol%. For all the formulations, the initiator (AIBN) was 1% of the total moles of double bonds in the mixture, while the total monomer concentration ( $C_M$ ) used was kept equal to 1 or 2%.

| Nanogel                    | Composition (mol%) |     |                 | $C_M$ (%) | Monomer Conversion (%) |     |                 |         | Yield (%) |
|----------------------------|--------------------|-----|-----------------|-----------|------------------------|-----|-----------------|---------|-----------|
|                            | NIPAM              | MBA | <i>t</i> -BAEMA |           | NIPAM                  | MBA | <i>t</i> -BAEMA | Overall |           |
| NG <sub>20</sub> -tBAEMA-1 | 70                 | 20  | 10              | 1         | 67                     | 88  | 97              | 75      | 64        |
| NG <sub>10</sub> -tBAEMA-1 | 80                 | 10  | 10              | 1         | 60                     | 75  | 98              | 65      | 48        |
| NG <sub>5</sub> -tBAEMA-1  | 85                 | 5   | 10              | 1         | 55                     | 68  | 97              | 59      | 29        |
| NG <sub>20</sub> -tBAEMA-2 | 70                 | 20  | 10              | 2         | 79                     | 95  | 99              | 84      | 79        |
| NG <sub>10</sub> -tBAEMA-2 | 80                 | 10  | 10              | 2         | 74                     | 91  | 99              | 79      | 62        |
| NG <sub>5</sub> -tBAEMA-2  | 85                 | 5   | 10              | 2         | 70                     | 83  | 99              | 74      | 50        |

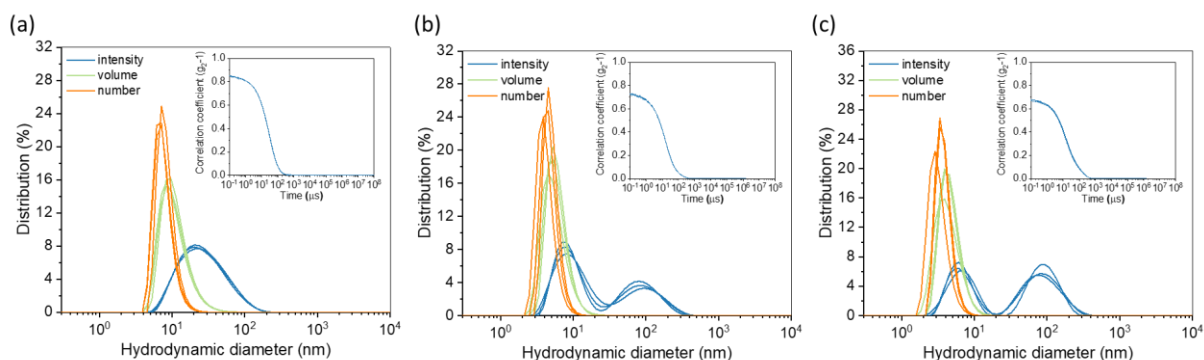

**Figure S1.** Triplicate DLS measurements of neutral nanogels, with crosslinker content between 5 and 20 mol%: **(a)** NG<sub>20-1</sub>; **(b)** NG<sub>10-1</sub>; and **(c)** NG<sub>5-1</sub> in deionized water (1 mg/mL, 25°C) by intensity (blue), volume (green) and number (orange) distributions. Inserts show correlogram of each triplicate measurement. The presence of a single peak by volume and number distributions suggests that the second population, observed by intensity for NG<sub>10-1</sub> and NG<sub>5-1</sub>, represents a negligible fraction of the samples.

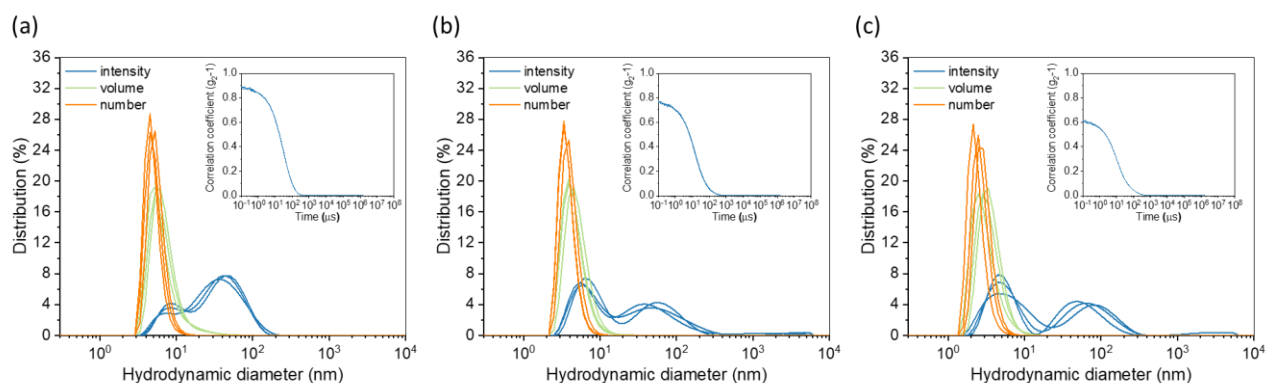

**Figure S2.** Triplicate DLS measurements of *t*-BAEMA nanogels, with crosslinker content between 5 and 20 mol%: **(a)** NG<sub>20</sub>-*t*BAEMA-3; **(b)** NG<sub>10</sub>-*t*BAEMA-3; and **(c)** NG<sub>5</sub>-*t*BAEMA-3 in deionized water (1 mg/mL, 25°C) by intensity (blue), volume (green) and number (orange) distributions. Inserts show correlogram of each triplicate measurement. The presence of a single peak by volume and number distributions suggests that the second population, observed by intensity, represents a negligible fraction of the samples.

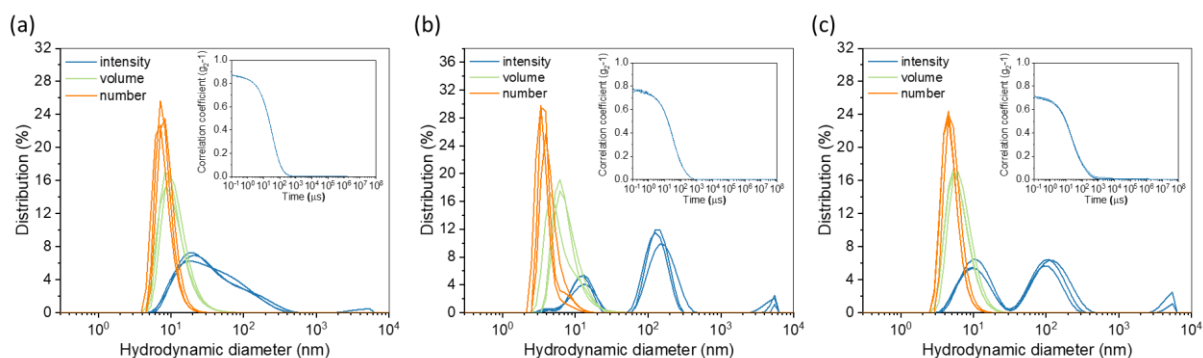

**Figure S3.** Triplicate DLS measurements of neutral nanogels, with crosslinker content between 5 and 20 mol%: **(a)** NG<sub>20</sub>-1; **(b)** NG<sub>10</sub>-1; and **(c)** NG<sub>5</sub>-1 in fish water with pH = 7 (1 mg/mL, 25°C) by intensity (blue), volume (green) and number (orange) distributions. Inserts show correlogram of each triplicate measurement. The presence of a single peak by volume and number distributions suggests that the second population, observed by intensity, represents a negligible fraction of the samples.

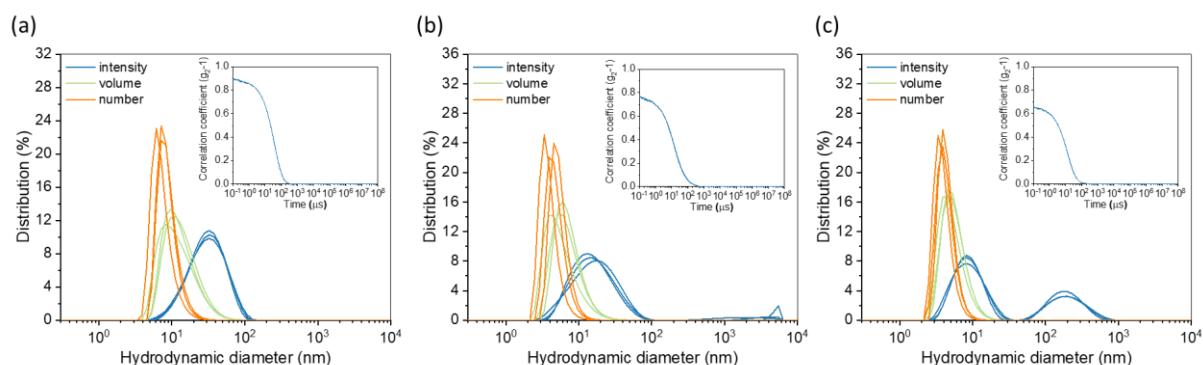

**Figure S4.** Triplicate DLS measurements of *t*-BAEMA nanogels, with crosslinker content between 5 and 20 mol%: **(a)** NG<sub>20</sub>-*t*BAEMA-3; **(b)** NG<sub>10</sub>- *t*BAEMA-3; and **(c)** NG<sub>5</sub>- *t*BAEMA-3 in fish water with pH = 7 (1 mg/mL, 25°C) by intensity (blue), volume (green) and number (orange) distributions. Inserts show correlogram of each triplicate measurement. The presence of a single peak by volume and number distributions suggests that the second population, observed by intensity for NG<sub>5</sub>-*t*BAEMA-3, represents a negligible fraction of the samples.

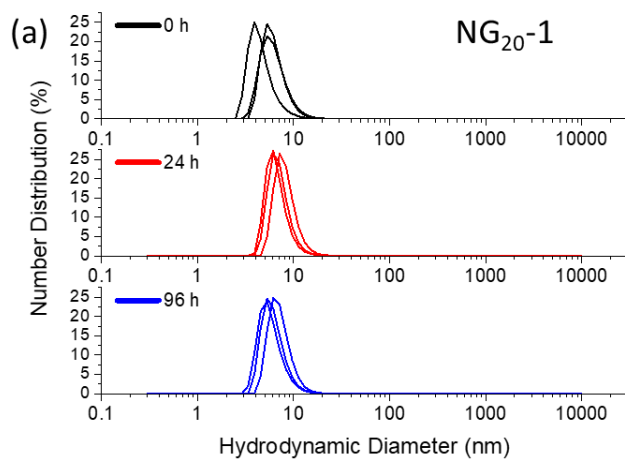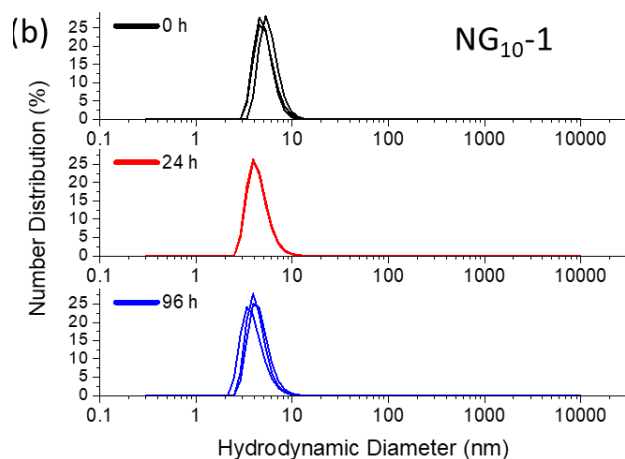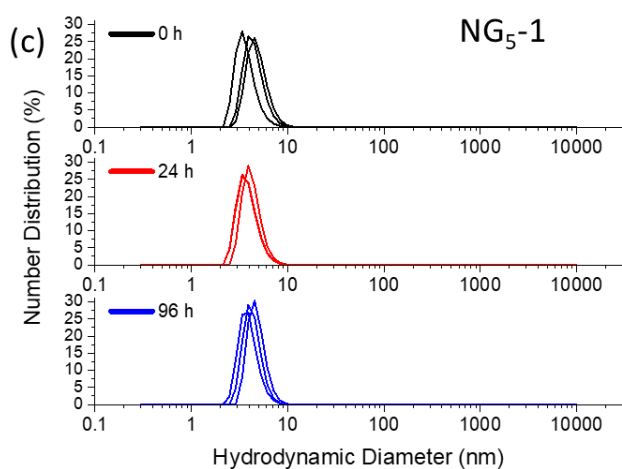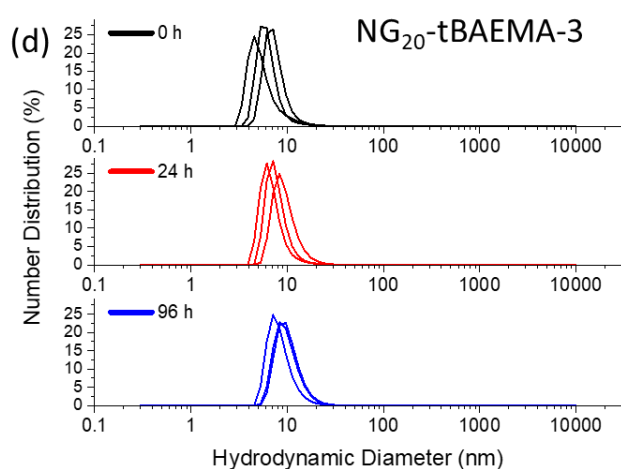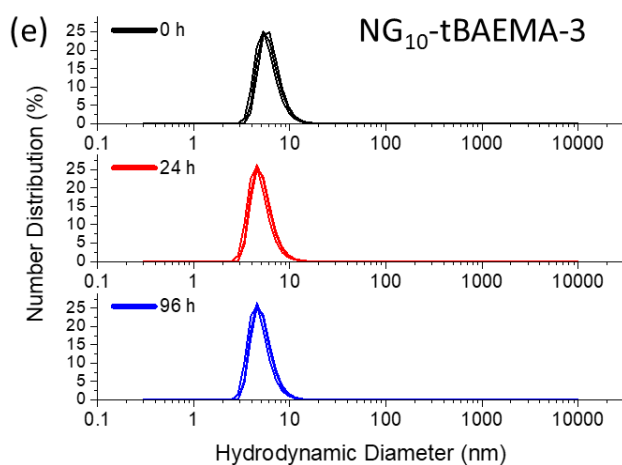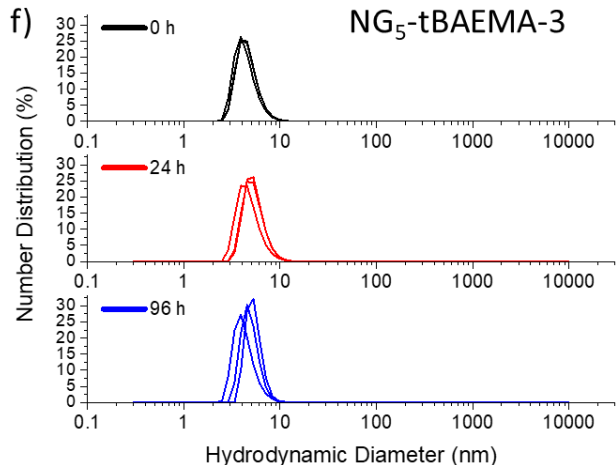

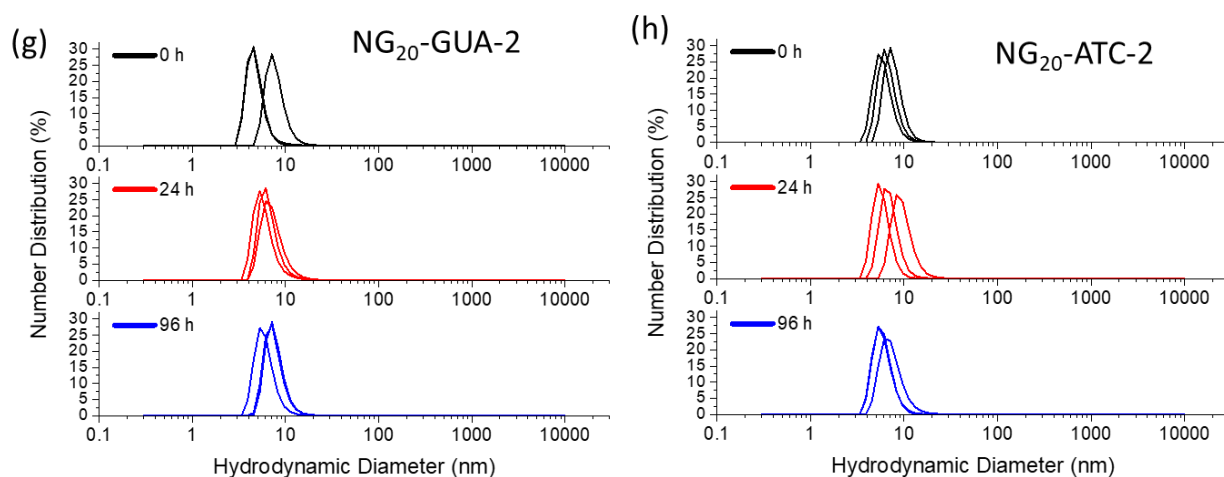

**Figure S5.** Colloidal stability studies of nanogels in fish water (pH = 7) at 28 °C (0.5 mg/mL). Triplicate DLS measurements (number distribution) of (a) NG<sub>20</sub>-1; (b) NG<sub>10</sub>-1; and (c) NG<sub>5</sub>-1 (d) NG<sub>20</sub>-tBAEMA-3; (e) NG<sub>10</sub>-tBAEMA-3; and (f) NG<sub>5</sub>-tBAEMA-3; (g) NG<sub>20</sub>-GUA-2; (h) NG<sub>10</sub>-ATC-2 were obtained after 0 (black), 24 (red), and 96 (blue) hours after reconstitution of the dry nanogel powders. Data show that nanogels are colloidal stable within the time frame of the *in vivo* toxicity studies.

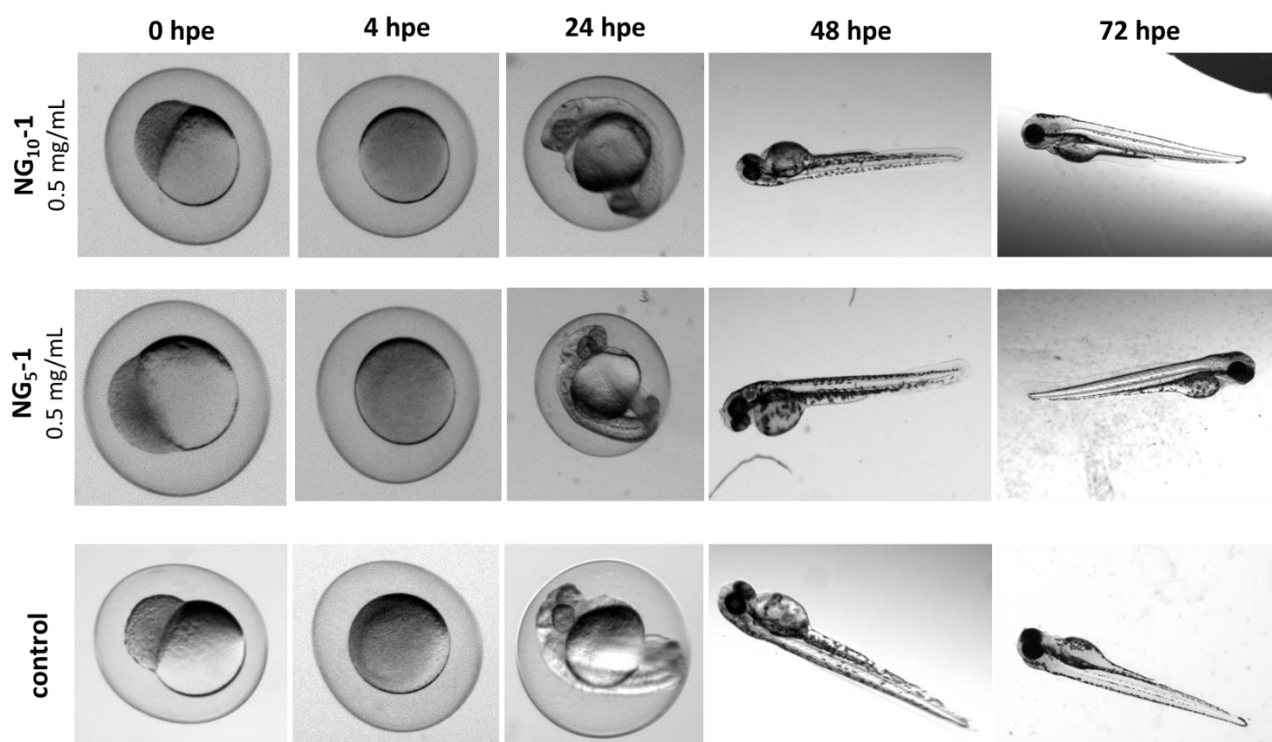

**Figure S6.** Stereomicroscopy assessment of the biocompatibility of neutral nanogels NG<sub>10-1</sub> (10 mol% crosslinker, first row) and NG<sub>5-1</sub> (5 mol% crosslinker, second row), in zebrafish up to 72 hours post exposure (hpe). The morphology and development of the embryos/larvae, exposed by immersion in nanogel solutions in fish water (concentration 0.5 mg/mL), was monitored at 0, 4 24, 48 and 72 hours after the administration and compared to non-exposed embryos/larvae used as negative control. These data are representative of the biocompatibility of neutral nanogels also at lower concentrations, *i.e.* 0.3 mg/mL and 0.1 mg/mL.

**Table S2.** Chemical composition, monomer conversions ( $^1\text{H}$  NMR) and chemical yields of positively charged NIPAM-based nanogels, containing 10 mol% of either *t*-BAEMA, or GUA, or ATC as functional monomer. All nanogels were synthesized keeping the crosslinker (MBA) content equal to 20 mol%. For each formulation, the optimization of the polymerizations led to a concentration of the initiator (AIBN) and a total monomer concentration ( $C_M$ ) between 1 and 2 mol% (of the total moles of double bonds in the mixture) and between 2 and 3%, respectively. The individual monomer conversion of ATC could not be determined because of the overlapping of its peaks with the ones of MBA.

| Nanogel                    | Composition (mol%) |     |            | AIBN (mol%) | C <sub>M</sub> (%) | Monomer Conversion (%) |     |                    | Yield (%) |    |
|----------------------------|--------------------|-----|------------|-------------|--------------------|------------------------|-----|--------------------|-----------|----|
|                            | NIPAM              | MBA | Co-monomer |             |                    | NIPAM                  | MBA | Co-monomer Overall |           |    |
| t-BAEMA                    |                    |     | t-BAEMA    |             |                    |                        |     |                    |           |    |
| NG <sub>20</sub> -tBAEMA-3 | 70                 | 20  | 10         | 1           | 3                  | 90                     | 98  | 99                 | 92        | 77 |
| GUA                        |                    |     | GUA        |             |                    |                        |     |                    |           |    |
| NG <sub>20</sub> -GUA-2    | 70                 | 20  | 10         | 2           | 2                  | 89                     | 97  | 94                 | 91        | 60 |
| ATC                        |                    |     | ATC        |             |                    |                        |     |                    |           |    |
| NG <sub>20</sub> -ATC-2    | 70                 | 20  | 10         | 2           | 2                  | 86                     | 97  | -                  | 89        | 54 |



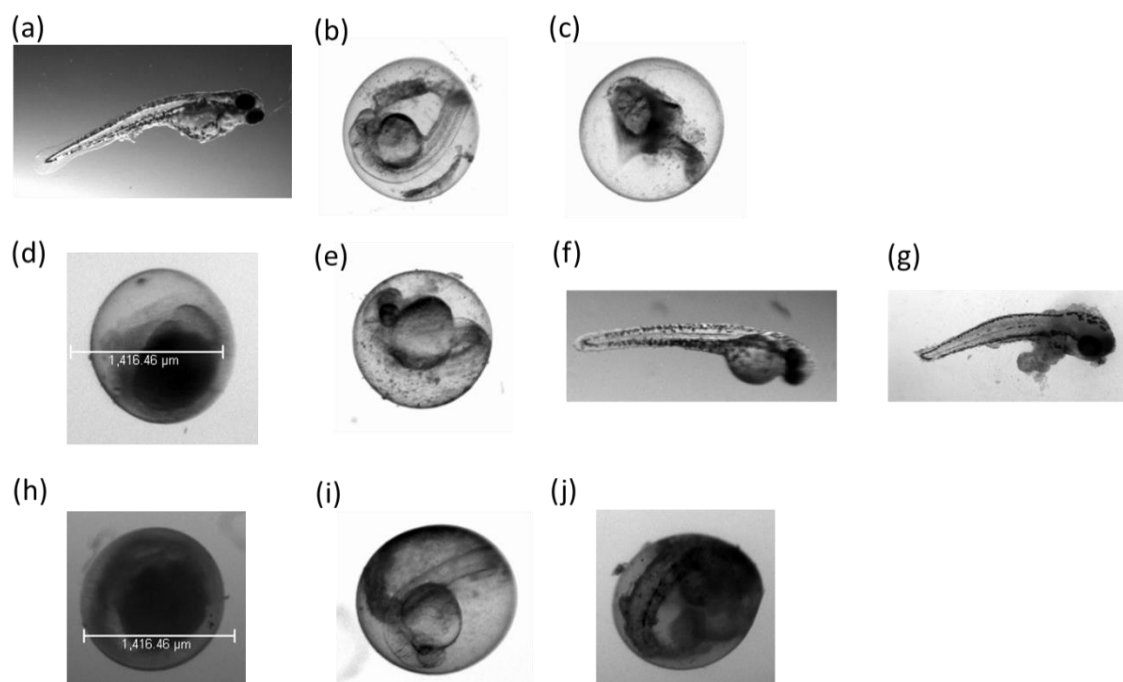

**Figure S7.** Examples of embryos/larvae dead after the immersion into nanogels solutions, for different times. In particular, the reported pictures show embryos/larvae exposed to : **(a)** NG<sub>20</sub>-tBAEMA-3 0.1 mg/mL for 96 h; **(b)** NG<sub>10</sub>-tBAEMA-3 0.1 mg/mL for 24 h; **(c)** NG<sub>5</sub>-tBAEMA-3 0.1 mg/mL for 24 h; **(d)** NG<sub>20</sub>-ATC-2 0.1 mg/mL for 4 h; **(e)** NG<sub>20</sub>-ATC-2 0.1 mg/mL for 24 h; **(f)** NG<sub>20</sub>-ATC-2 0.05 mg/mL for 48 h; **(g)** NG<sub>20</sub>-ATC-2 0.03 mg/mL for 72 h; **(h)** NG<sub>20</sub>-GUA-2 0.1 mg/mL for 4 h; **(i)** NG<sub>20</sub>-GUA-2 0.1 mg/mL for 24 h; **(j)** NG<sub>20</sub>-GUA-2 0.05 mg/mL for 48 h. Panels **(d)**, **(g)**, **(h)** and **(j)** were found to be necrotic, while the other panels show embryos/larvae with normal morphology but appearing to be disintegrating, as common after the death.

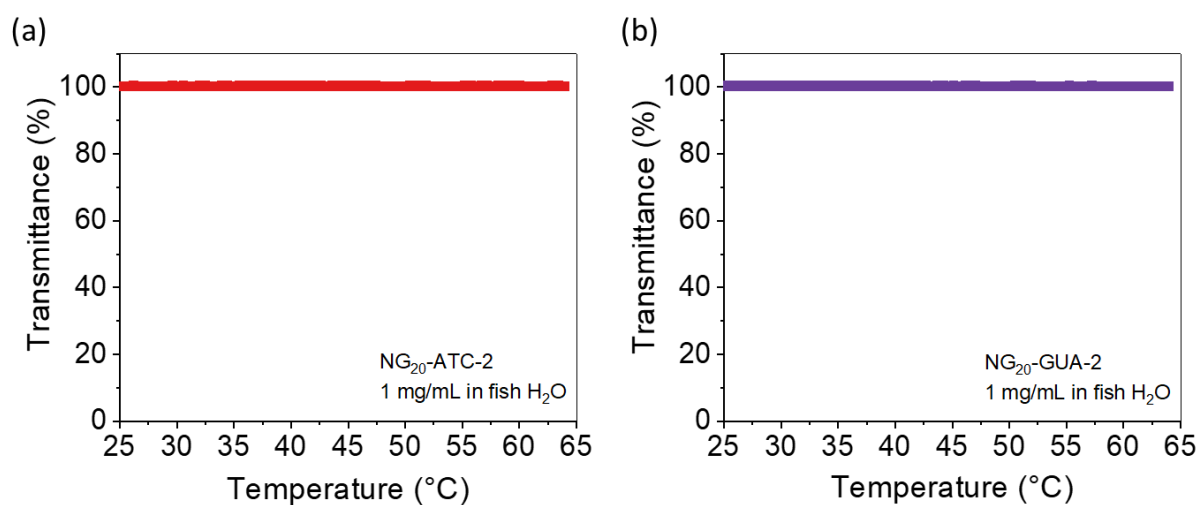

**Figure S8.** UV-visible spectroscopy study of the thermo responsive properties of the positively charged nanogels, containing 20 mol% of crosslinker, **(a)** NG<sub>20</sub>-ATC-2 and **(b)** NG<sub>20</sub>-GUA-2 in fish water (concentration 1 mg/mL), in a temperature range between 25 and 65°C.

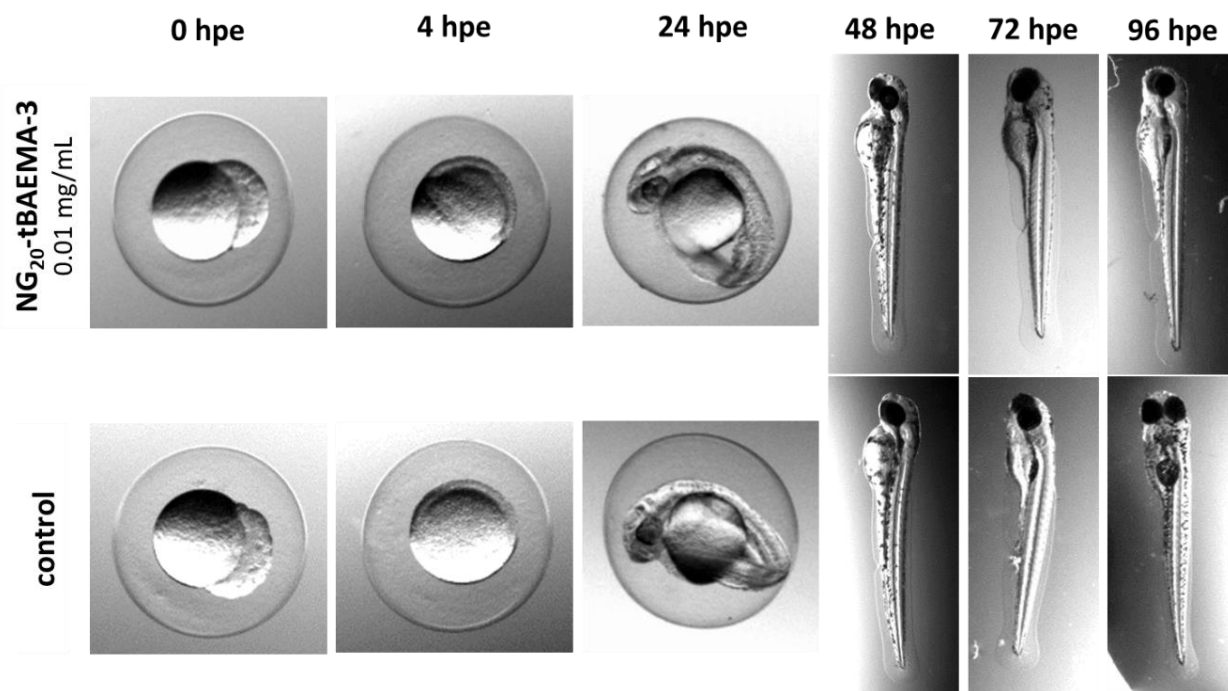

**Figure S9.** Stereomicroscopy assessment of the biocompatibility of the positively charged nanogel NG<sub>20</sub>-tBAEMA-3 (20 mol% crosslinker, and 10 mol% of *t*-BAEMA), in zebrafish up to 96 hours post exposure (hpe). The morphology and development of the embryos/larvae, exposed by immersion in nanogel solutions in fish water (concentration 0.01 mg/mL), was monitored at 0, 4 24, 48, 72 and 96 hours after the administration and compared to non-exposed embryos/larvae used as negative control.
